# Supplementary material
Source: publisher figshare collection journal article supplement (https://acs.figshare.com/ndownloader/files/10935218)
Supplement: Supplementary file 1 [file 10935218]

## Supporting Information

**Title:** The cornucopia of structures in the pseudobinary system (SnSe)<sub>x</sub>Bi<sub>2</sub>Se<sub>3</sub> – A crystal-chemical copycat

**Authors:** *Frank Heinke,<sup>a</sup> Philipp Urban,<sup>a</sup> Anton Werwein,<sup>a</sup> Christina Fraunhofer,<sup>a,b</sup> Tobias Rosenthal,<sup>b</sup> Stefan Schwarzmüller,<sup>a</sup> Daniel Souchay,<sup>a</sup> Felix Fahrnbauer,<sup>a</sup> Vadim Dyadkin,<sup>c</sup> Gerald Wagner<sup>a</sup> and Oliver Oeckler<sup>a,\*</sup>*

a) Leipzig University, Faculty of Chemistry and Mineralogy, IMKM, Scharnhorststr. 20, 04275 Leipzig, Germany

b) LMU Munich, Department of Chemistry, Butenandtstr. 5-13 (D), 81377 Munich, Germany

c) European Synchrotron Radiation Facility, 71 avenue des Martyrs, CS 40220, 38043 Grenoble, France

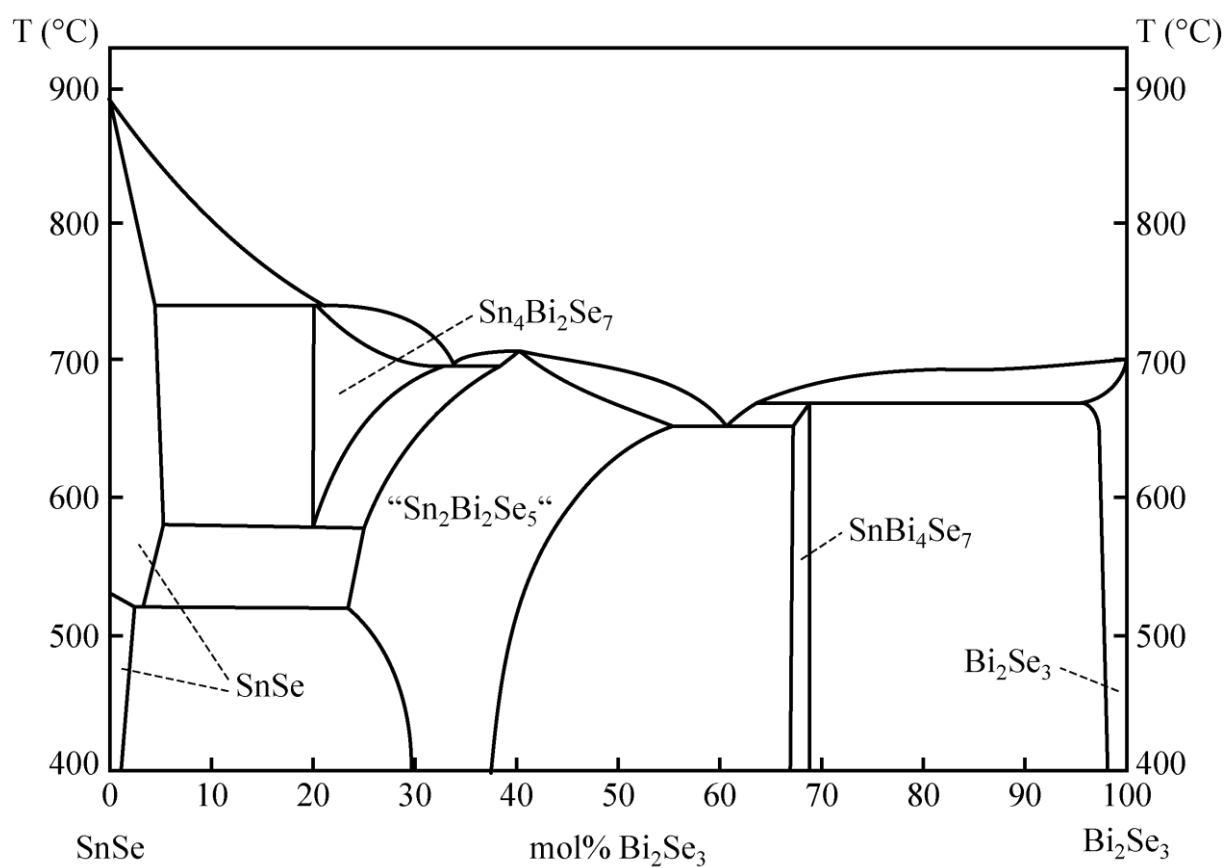

**Figure S1:** Phase diagram for the pseudo-binary system SnSe-Bi<sub>2</sub>Se<sub>3</sub>, redrawn from: Adouby, K.; Elidrissi Moubtassim, M. L.; Vicente, C. P.; Jumas, J. C.; Touré, A. A. X-ray diffraction, <sup>119</sup>Sn Mössbauer and thermal study of SnSe-Bi<sub>2</sub>Se<sub>3</sub> system. *J. Alloys Compd.* **2008**, *453*, 161-166.

**Table S1:** Synthesis parameters of ternary tin bismuth selenides: nominal compositions, local sample names, melting conditions, annealing conditions (including remarks on quenching to room temperature) and parameters for chemical transport reaction as well as information on the utilization of the respective samples.

| nominal composition<br>sample name                                  | used for ...                                                                                    | melting at ...<br>- quenched in ...                                       | annealing at ...<br>- then quenched in ... | chemical transport<br>temperature (hot/cold) | transport agent       |
|---------------------------------------------------------------------|-------------------------------------------------------------------------------------------------|---------------------------------------------------------------------------|--------------------------------------------|----------------------------------------------|-----------------------|
| (SnSe) <sub>3</sub> Bi <sub>2</sub> Se <sub>3</sub><br>PUT062       | a) PXRD<br>b) SEM-EDX                                                                           | 950 °C (for 21 h)<br>- H <sub>2</sub> O                                   | ---                                        | ---                                          | ---                   |
| (SnSe) <sub>4</sub> Bi <sub>2</sub> Se <sub>3</sub> **<br>PUT060    | a) PXRD<br>b) SCXRD<br>c) SEM-EDX                                                               | 940 °C (for 17.5 h)<br>- H <sub>2</sub> O                                 | ---                                        | 640 °C / 585 °C<br>(for 19 h)                | 3.6 mg I <sub>2</sub> |
| (SnSe) <sub>4</sub> Bi <sub>2</sub> Se <sub>3</sub> ***<br>PUT078   | a) thermoelectric characterization<br>b) PXRD                                                   | 940 °C (for 2.5 h)<br>- air                                               | ---                                        | ---                                          | ---                   |
| (SnSe) <sub>4</sub> Bi <sub>2</sub> Se <sub>3</sub><br>PU086        | a) thermoelectric characterization<br>b) PXRD                                                   | 940 °C (for 4 h) - air                                                    | ---                                        | ---                                          | ---                   |
| (SnSe) <sub>5</sub> Bi <sub>2</sub> Se <sub>3</sub> *<br>PUT066     | a) PXRD                                                                                         | 940 °C (for 19.5 h)<br>- N <sub>2</sub> (liquid)                          | ---                                        | ---                                          | ---                   |
| (SnSe) <sub>0.5</sub> Bi <sub>2</sub> Se <sub>3</sub> **<br>PUT069  | a) PXRD<br>b) SCXRD<br>c) TEM study                                                             | 940 °C (for 21.5 h)<br>- H <sub>2</sub> O                                 | 620 °C (for 167 h)<br>- air                | 547 °C / 445 °C<br>(for 94 h)                | 4.6 mg I <sub>2</sub> |
| (SnSe) <sub>0.5</sub> Bi <sub>2</sub> Se <sub>3</sub> ***<br>FRHW13 | a) thermoelectric characterization<br>b) PXRD<br>c) TEM study                                   | 900 °C (for 48.5 h)<br>- air                                              | 500 °C (for 167 h)<br>- H <sub>2</sub> O   | ---                                          | ---                   |
| (SnSe) <sub>2</sub> Bi <sub>2</sub> Se <sub>3</sub><br>PUT071       | a) PXRD<br>b) SCXRD                                                                             | 940 °C (for 3 h)<br>- H <sub>2</sub> O                                    | 620 °C (163 h)<br>- H <sub>2</sub> O       | ---                                          | ---                   |
| (SnSe) <sub>2</sub> Bi <sub>2</sub> Se <sub>3</sub> ***<br>FRHW32   | a) thermoelectric characterization<br>b) PXRD<br>c) TEM study<br>d) resonant SCXRD measurements | 900 °C (for 0.5 h)<br>- slow cooling                                      | 620 °C (for 264 h)<br>- H <sub>2</sub> O   | ---                                          | ---                   |
| (SnSe) <sub>-1.86</sub> Bi <sub>2</sub> Se <sub>3</sub><br>FRHW09   | a) PXRD<br>b) resonant SCXRD measurements                                                       | 900 °C (for 24 h)<br>- H <sub>2</sub> O                                   | 530 °C (for 120 h)<br>- H <sub>2</sub> O   | ---                                          | ---                   |
| (SnSe) <sub>1.5</sub> Bi <sub>2</sub> Se <sub>3</sub><br>PU089      | a) PXRD<br>b) SCXRD<br>c) SEM-EDX                                                               | a) 900 °C (for 72 h) - air<br>b) 900 °C (19 )<br>- slow cooling to 550 °C | 550 °C (for 90 h)<br>- air                 | ---                                          | ---                   |

\* For quenching in liquid nitrogen, an ampoule containing the melt was removed from the furnace at 940 °C and cracked open at a predetermined breaking point so that the liquid melt could be poured on an aluminium plate cooled with liquid nitrogen.

\*\* For chemical vapor transport, ~150 mg of fused and air-quenched materials were crushed and sealed in silica glass ampoules (length ~20 cm, diameter 15 mm) under vacuum with ~3 wt% iodine (Alfa Aesar, sublimed, 99.8 %) as transport agent. Chemical vapor transport took place in a two-zone furnace.

\*\*\* Samples for the thermoelectric characterization of (SnSe)<sub>4</sub>Bi<sub>2</sub>Se<sub>3</sub>, (SnSe)<sub>0.5</sub>Bi<sub>2</sub>Se<sub>3</sub> and (SnSe)<sub>2</sub>Bi<sub>2</sub>Se<sub>3</sub> (total weight ~3 g each) were synthesized in a similar way as the melt-quenched or annealed samples of smaller total weight, using ampoules with a flat bottom (length ~10 cm, diameter 15 mm). After removing them from the furnace, they were fixed in vertical orientation in order to solidify the melt as a flat ingot on the bottom of the ampoule. These ingots were polished with SiC grinding powder and cut to cuboid shapes when necessary.

**Table S2:** Experimental densities of samples for thermoelectric characterization compared with the corresponding theoretical ("X-ray") densities derived from crystal structure data.

| chemical composition                               | structure type                    | experimental density in g/cm <sup>3</sup> | theoretical density in g/cm <sup>3</sup> | percentage of theoretical density |
|----------------------------------------------------|-----------------------------------|-------------------------------------------|------------------------------------------|-----------------------------------|
| Sn <sub>4</sub> Bi <sub>2</sub> Se <sub>7</sub>    | NaCl                              | 6.500                                     | 6.581 (single crystal data)              | 98.8 %                            |
| SnBi <sub>4</sub> Se <sub>7</sub>                  | GeSb <sub>2</sub> Te <sub>4</sub> | 7.218                                     | 7.324                                    | 98.6 %                            |
| „Sn <sub>2</sub> Bi <sub>2</sub> Se <sub>5</sub> “ | L4,4 lillianite                   | 6.828                                     | 6.854“                                   | 99.6 %                            |

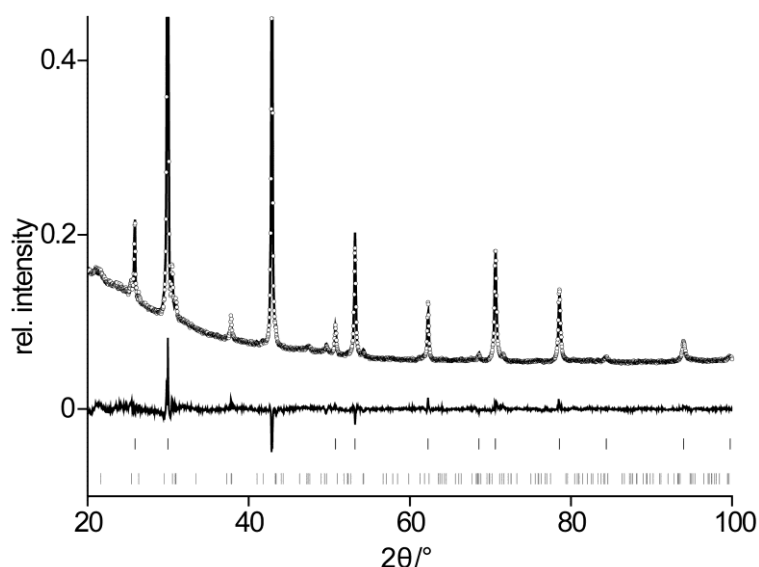

**Figure S2:** Rietveld refinement for a melt-quenched sample with the nominal composition Sn<sub>5</sub>Bi<sub>2</sub>Se<sub>8</sub> (x = 5, the strongest reflection is truncated at 45% of the maximum intensity): data points are drawn as circles, calculated data as a black line, difference plot as a black line below, reflection positions indicated by vertical lines for the cubic phase (top row) and for SnSe (bottom row).

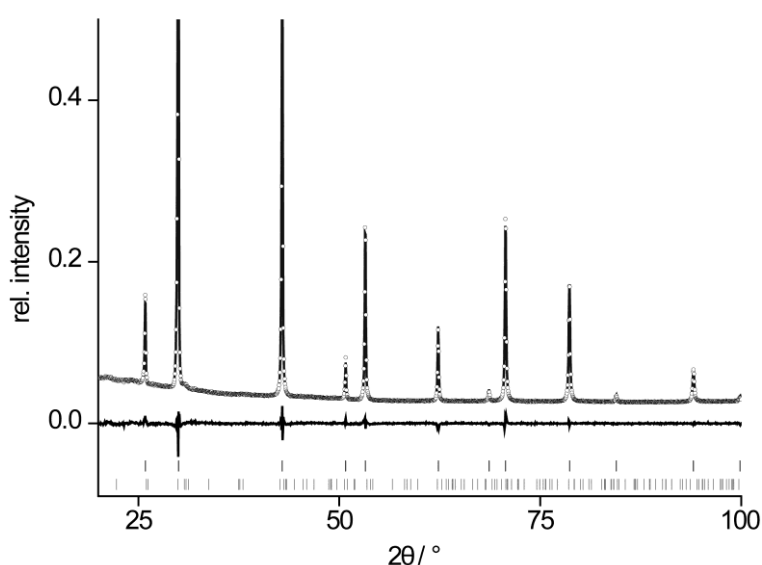

**Figure S3:** Rietveld refinement for a melt-quenched sample with the composition Sn<sub>4</sub>Bi<sub>2</sub>Se<sub>7</sub> (x = 4, the strongest reflection is truncated at 50% of the maximum intensity): data points are drawn as circles, calculated data as a black line, difference plot as a black line below, reflection positions indicated by vertical lines for the cubic phase (top row) and for SnSe (bottom row).

**Table S3:** Crystal data and results of the Rietveld refinement of quenched  $\text{Sn}_5\text{Bi}_2\text{Se}_8 = \text{Sn}_{0.625}\text{Bi}_{0.25}\text{Se}$ . Also note the footnote of Table S3.

|                    |                                                      |                                                                                      |
|--------------------|------------------------------------------------------|--------------------------------------------------------------------------------------|
| formula            | $\text{Sn}_{0.582}\text{Bi}_{0.279}\text{Se}^*$      | SnSe                                                                                 |
| phase fraction     | 90 wt-%                                              | 10 wt-%                                                                              |
| formula mass       | 205.39 $\text{g mol}^{-1}$                           | 197.67 $\text{g mol}^{-1}$                                                           |
| crystal system     | cubic                                                | orthorhombic                                                                         |
| space group        | $Fm\bar{3}m$                                         | $Pnma$                                                                               |
| cell parameters    | $a = 5.95931(13)\text{\AA}$                          | $a = 11.541(2)\text{\AA}$<br>$b = 4.1663(9)\text{\AA}$<br>$c = 4.3976(11)\text{\AA}$ |
| cell volume        | 211.636(2) $\text{\AA}^3$                            | 211.45(8) $\text{\AA}^3$                                                             |
| X-ray density      | 6.4764 (4) $\text{g cm}^{-3}$                        | 6.209(2) $\text{g cm}^{-3}$                                                          |
| Z                  | 4                                                    | 4                                                                                    |
| $R_{\text{Bragg}}$ | 0.036                                                | 0.022                                                                                |
| radiation          | Cu- $K_{\alpha 1}$ ( $\lambda = 1.54051\text{\AA}$ ) |                                                                                      |
| 2 $\theta$ range   | $4^\circ < 2\theta < 100^\circ$                      |                                                                                      |
| refined parameters | 31, thereof 18 for background                        |                                                                                      |
| $R_p / R_{wp}$     | 0.016 / 0.023                                        |                                                                                      |
| GooF               | 1.148                                                |                                                                                      |

\* The composition was constrained to  $\text{Sn}_{0.582}\text{Bi}_{0.279}\text{Se}$ . This takes into account the exsolution of SnSe according to the following reaction equation:  $\text{Sn}_{0.625}\text{Bi}_{0.25}\text{Se} \rightarrow 0.104 \text{ SnSe} + \text{Sn}_{0.521}\text{Bi}_{0.25}\text{Se}_{0.896}$  ( $= \text{Sn}_{0.582}\text{Bi}_{0.279}\text{Se}$ ).

**Table S4:** Coordinates, site occupancies and equivalent isotropic displacement parameters of rocksalt-type  $\text{Sn}_{0.582}\text{Bi}_{0.279}\text{Se}$  in a sample with the nominal composition  $\text{Sn}_5\text{Bi}_2\text{Se}_8 = \text{Sn}_{0.625}\text{Bi}_{0.25}\text{Se}$ .

| Atom    | Wyckoff position | x   | y   | z   | s.o.f. *      | $B_{\text{iso}} / \text{\AA}^2$ |
|---------|------------------|-----|-----|-----|---------------|---------------------------------|
| Se1     | 4a               | 0   | 0   | 0   | 1             | 1.32(6)                         |
| Sn2/Bi2 | 4b               | 1/2 | 1/2 | 1/2 | 0.582 / 0.279 | 1.53(5)                         |

\* site occupancies constrained to composition  $\text{Sn}_{0.582}\text{Bi}_{0.279}\text{Se}$ .

**Table S5:** Crystallographic data and results of the Rietveld refinement of quenched  $\text{Sn}_4\text{Bi}_2\text{Se}_7 = \text{Sn}_{0.57}\text{Bi}_{0.29}\text{Se}$  ( $x = 4$ , the composition was constrained to the nominal composition, which is not changed significantly by the small amount of SnSe as a side phase).\*

|                      |                                                        |                                                                                        |
|----------------------|--------------------------------------------------------|----------------------------------------------------------------------------------------|
| formula              | $\text{Sn}_{0.57}\text{Bi}_{0.29}\text{Se}_1$          | SnSe                                                                                   |
| phase fraction       | 98 wt-%                                                | 2 wt-%                                                                                 |
| formula mass         | 206.54 $\text{g mol}^{-1}$                             | 197.67 $\text{g mol}^{-1}$                                                             |
| crystal system       | cubic                                                  | orthorhombic                                                                           |
| space group          | $Fm\bar{3}m$                                           | $Pnma$                                                                                 |
| cell parameters      | $a = 5.95581(4) \text{ \AA}$                           | $a = 11.63(2) \text{ \AA}$<br>$b = 4.196(7) \text{ \AA}$<br>$c = 4.243(8) \text{ \AA}$ |
| cell volume          | $211.262(5) \text{ \AA}^3$                             | $207.0(6) \text{ \AA}^3$                                                               |
| X-ray density        | $6.4935(2) \text{ g cm}^{-3}$                          | $6.34(2) \text{ g cm}^{-3}$                                                            |
| $Z$                  | 4                                                      | 4                                                                                      |
| $R_{\text{Bragg}}$   | 0.009                                                  | 0.008                                                                                  |
| radiation            | Cu- $K_{\alpha 1}$ ( $\lambda = 1.54051 \text{ \AA}$ ) |                                                                                        |
| $2\theta$ range      | $4^\circ < 2\theta < 100^\circ$                        |                                                                                        |
| refined parameters   | 25                                                     |                                                                                        |
| background parameter | 12                                                     |                                                                                        |
| $R_p / R_{wp}$       | 0.016 / 0.022                                          |                                                                                        |
| GooF                 | 0.955                                                  |                                                                                        |

\* For the rocksalt-type phases with  $x = 3$  (see main text) and  $x = 4$ , microstrain peak broadening was considered by a Lorentzian function and crystallite-size broadening by a Gaussian function for  $\text{Sn}_3\text{Bi}_2\text{Se}_6$  ( $x = 3$ ) and a convolution of a Gaussian and a Lorentzian function for  $\text{Sn}_4\text{Bi}_2\text{Se}_7$  and  $\text{Sn}_5\text{Bi}_2\text{Se}_8$  ( $x = 4$ ,  $x = 5$ ), respectively. The peak broadening of SnSe due to crystallite size effects was described with a Gaussian function. Preferred orientation of SnSe was taken into account by spherical harmonics of the fourth order. The atomic parameters of SnSe were taken from literature [Adouby, K.; Pérez Vicente, C.; Jumas, J. C. Z. *Kristallogr.* **1998**, 213, 343-349] and not refined, only the unit-cell parameters were refined.

**Table S6:** Coordinates, site occupancies and equivalent isotropic displacement parameters of rocksalt-type  $\text{Sn}_4\text{Bi}_2\text{Se}_7 = \text{Sn}_{0.57}\text{Bi}_{0.29}\text{Se}$  ( $x = 4$ ).

| Atom    | Wyckoff position | $x$ | $y$ | $z$ | s.o.f.       | $B_{\text{iso}} / \text{\AA}^2$ |
|---------|------------------|-----|-----|-----|--------------|---------------------------------|
| Se1     | 4a               | 0   | 0   | 0   | 1            | 0.74(3)                         |
| Sn2/Bi2 | 4b               | 1/2 | 1/2 | 1/2 | 0.57 / 0.29* | 1.03(2)                         |

\* s.o.f. constrained to match the nominal composition of  $\text{Sn}_{0.57}\text{Bi}_{0.28}\text{Se}$ .

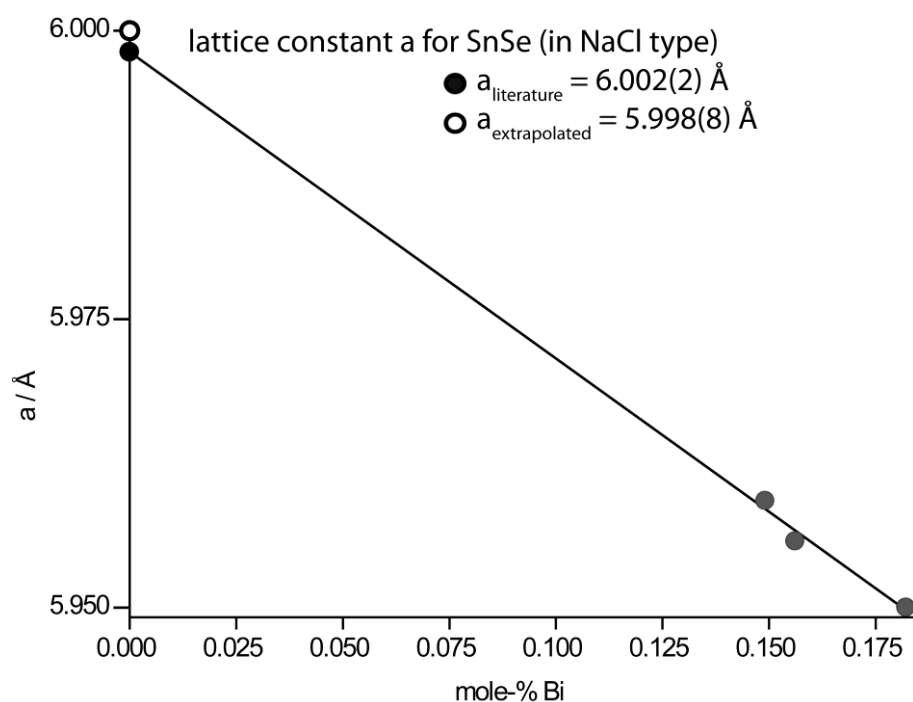

**Figure S4:** Lattice parameters of quenched rocksalt-type phases  $(\text{SnSe})_x\text{Bi}_2\text{Te}_3$  (gray points) as a function of the Bi content (Vegard's law) with the extrapolated lattice parameter of SnSe in the NaCl structure type (black point) and the value reported for thin films of NaCl-type SnSe in the literature (empty circle; I. R. Nuriev, A. K. Sharifova, *Sov. Phys. Crystallogr.* **1989**, 34, 635-636). The lattice parameters of the rocksalt-type phases decrease with increasing  $\text{Bi}_2\text{Se}_3$  content, which can be explained by the simultaneously increasing number of vacancies and  $\text{Bi}^{3+}$  ions incorporated in the structure;  $\text{Bi}^{3+}$  ions are expected to be smaller than  $\text{Sn}^{2+}$  ions due to their higher charge. However, an explanation by means of the different ionic radii of  $\text{Bi}^{3+}$  and  $\text{Sn}^{2+}$  is not as straightforward as for other main group element ions because the ionic radius on  $\text{Sn}^{2+}$  is not determined reliably (cf. Shannon, R. D.; *Acta Crystallogr. Sect. A* **1976**, 32, 751-767).

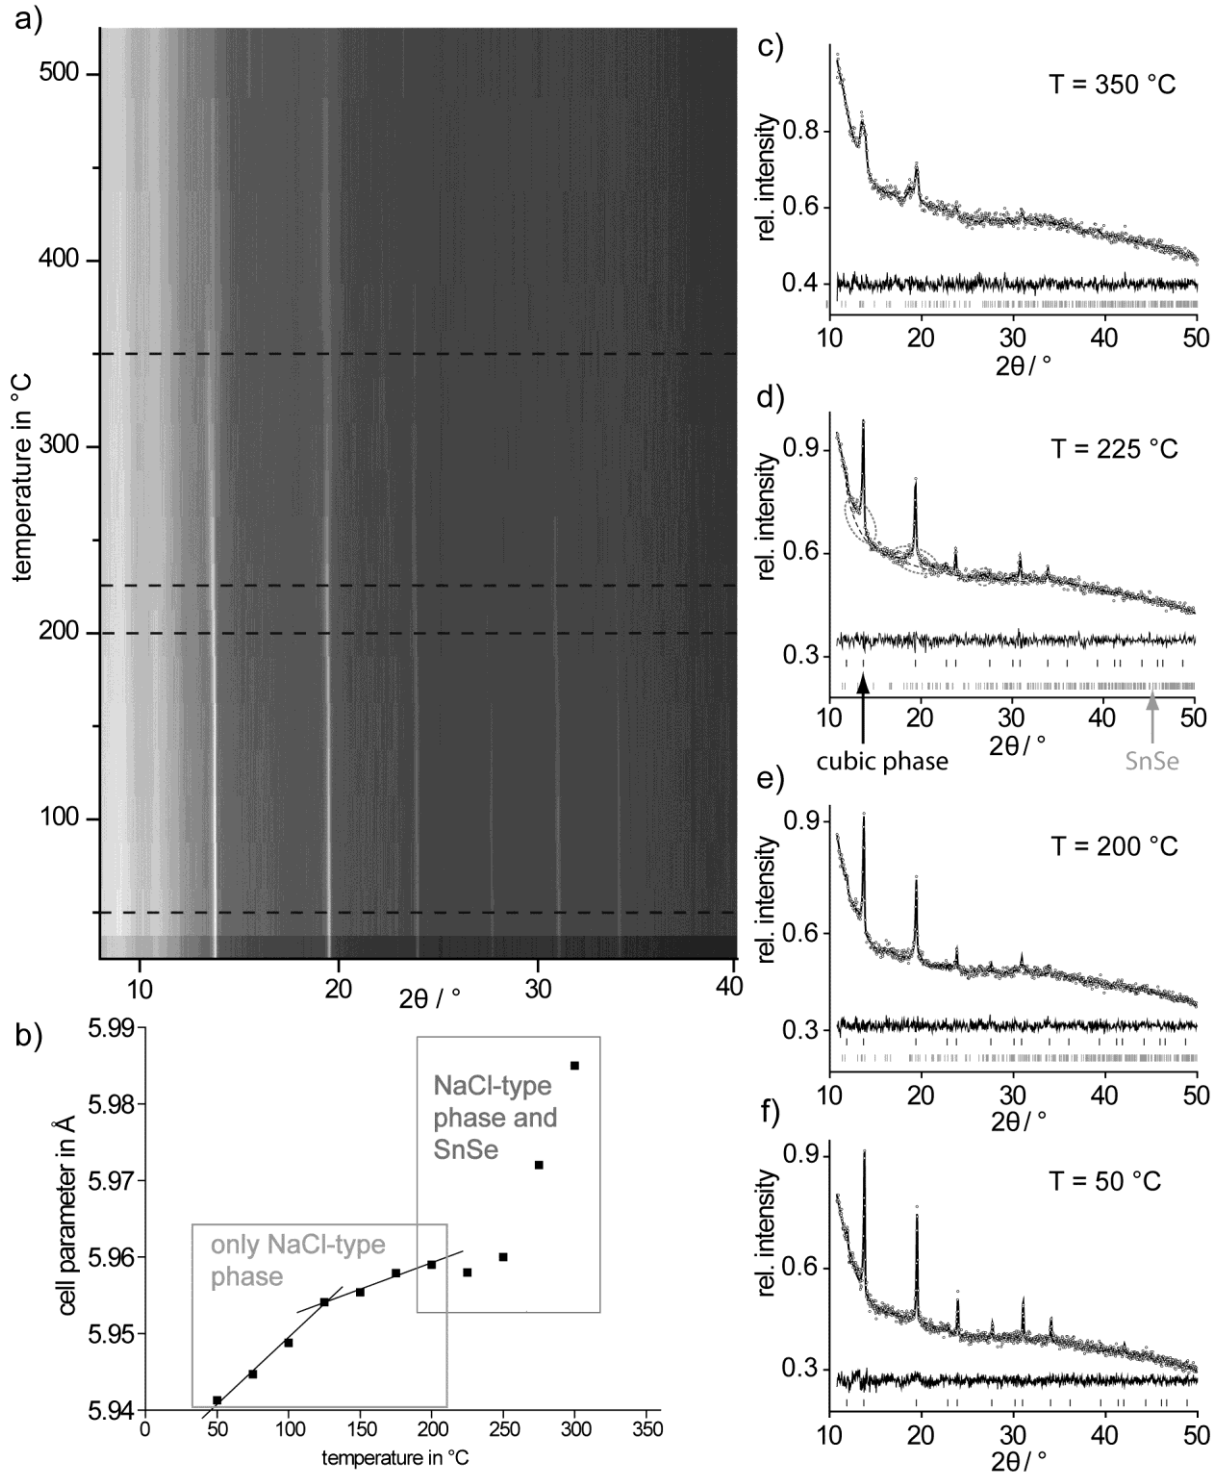

**Figure S5:** a) HT-PXRD plot for a quenched sample with the nominal composition  $\text{Sn}_4\text{Bi}_2\text{Se}_7$  up to 500 °C, dotted lines indicate the patterns shown on the right [c)-f)]; b) progression of the cubic lattice parameter  $a$  upon heating with changing slope at 125 °C; c)-f) Rietveld refinements for selected patterns at different temperatures: data points are drawn as circles, calculated data as a black line, difference plot as a black line below, reflection positions indicated by vertical lines for the cubic phase (black) and for SnSe (gray); in d) dotted ellipsoids indicate misfits and the broken line represents the background fit.



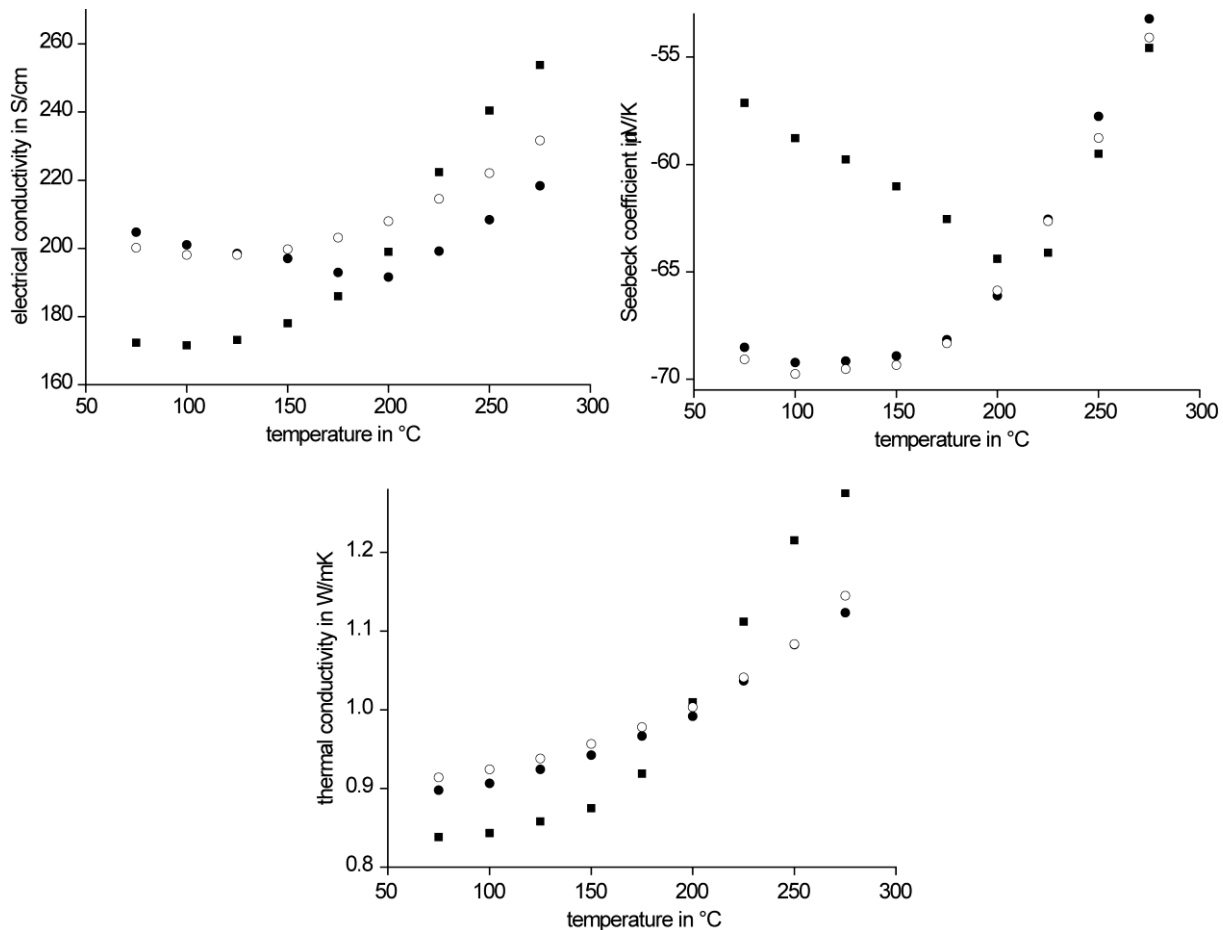

**Figure S6:** Thermal conductivity (bottom), Seebeck coefficient (top right) and electrical conductivity (top left) of a sample with the nominal composition  $\text{Sn}_4\text{Bi}_2\text{Se}_7$  (black spheres = averaged heating curves and hollow spheres = averaged cooling curves after the decomposition, black squares = first heating step).

#### Difference Fourier maps:

The off-edge dataset of the L7,7-type structure was tested regarding a possible description as a twin in the lower symmetric space group  $Cmc2_1$  instead of  $Cmcm$ . The following figures depict the residual electron densities around the interconnecting cation site between the NaCl-type slabs.

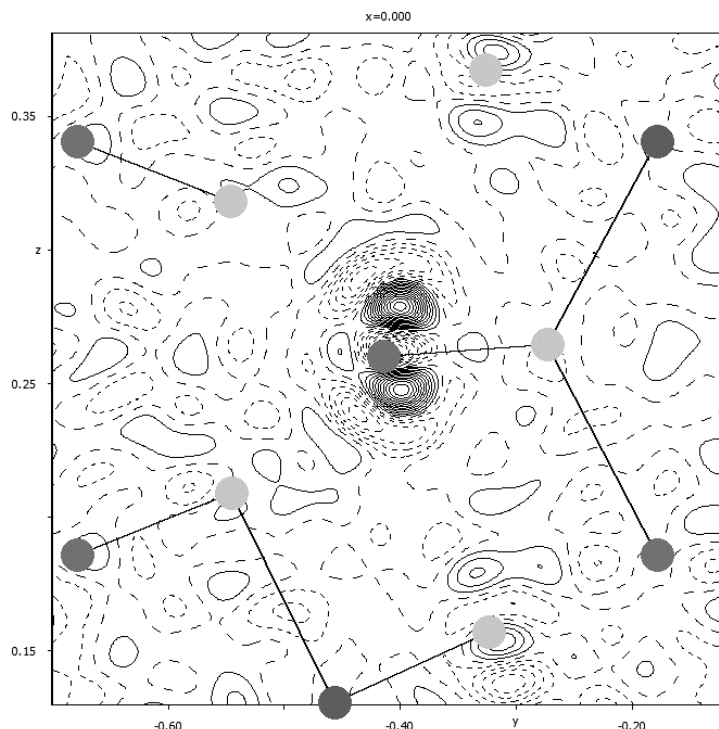

**Figure S7:** Residual electron densities around the cation site interconnecting the NaCl-type slabs for the structure refinement in space  $Cmc2_1$  with a mirror plane perpendicular  $[001]$  as twin law; light gray circles depict Se atoms and dark gray circles depict the cation positions, contour = 0.5 electrons.

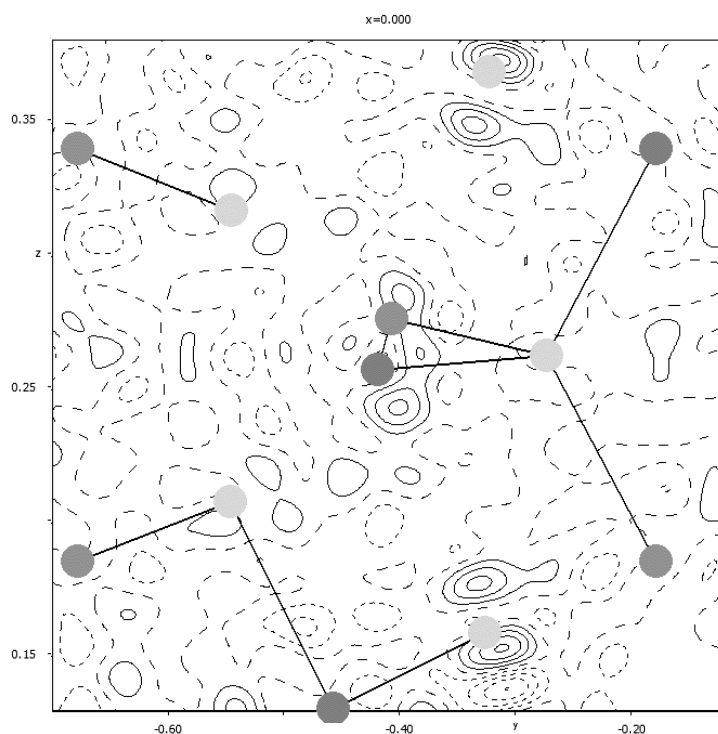

**Figure S8:** Residual electron densities around the cation site interconnecting the NaCl-type slabs for the structure refinement in space  $Cmc2_1$  with split position for the interconnecting cation site. Light gray circles depict Se atoms and dark gray circles depict the cation positions, contour = 0.5 electrons.

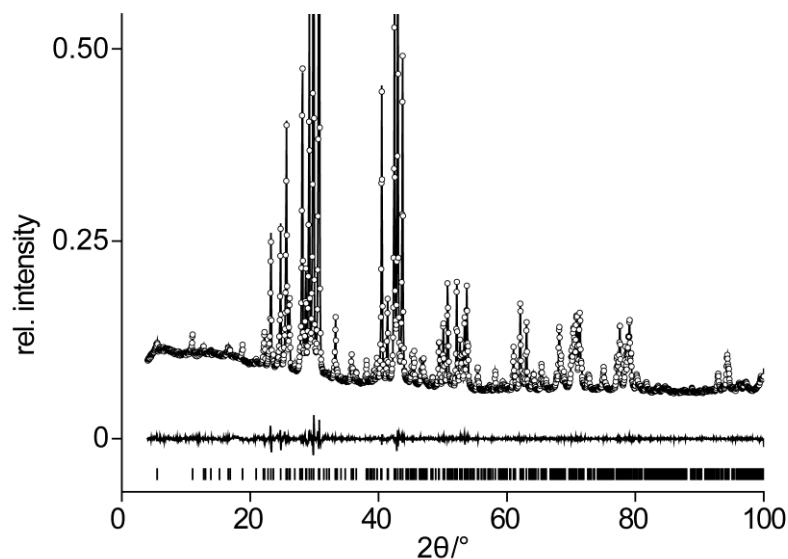

**Figure S9:** Rietveld refinement of a sample (annealed at 940 °C, then water-quenched) with the nominal composition  $(\text{SnSe})_2\text{Bi}_2\text{Se}_3$  (strongest reflection truncated at 55 % of max. intensity), data points drawn as circles, calculated data as black line; difference plot as black line below; reflection positions indicated by vertical lines; L7,7 model taken from the single crystal refinement of  $\text{Sn}_{3.6}\text{Bi}_{3.6}\text{Se}_9$  (cf. Tables 5 and S7; cell parameters refined, atom coordinates fixed, refined overall isotropic displacement for anions and cations each);  $R_p = 0.021$ ,  $R_{wp} = 0.027$ ,  $\text{GooF} = 1.246$  (preferred orientation taken into account by 6<sup>th</sup> order spherical harmonics with individual sets of parameters; crystallite size by convolution of a Gaussian and a Lorentzian function, microstrain by a Lorentzian function).

**Table S7:** Atom positions, site occupancies and equivalent isotropic displacement parameters (in Å<sup>2</sup>) of  $\text{Sn}_{3.6}\text{Bi}_{3.6}\text{Se}_9$  at RT,  $U_{eq} = 1/3 \cdot [U_{11} + U_{22} + U_{33}]$ .

| Atom       | Site | x | y            | z            | $U_{eq}$    | s.o.f.                | overall occupancy |
|------------|------|---|--------------|--------------|-------------|-----------------------|-------------------|
| Sn1<br>Bi1 | 8d   | 0 | 0.178251(19) | 0.172730(9)  | 0.03128(10) | 0.581(14)<br>0.376(7) | 0.957(14)         |
| Sn2<br>Bi2 | 8d   | 0 | 0.26869(2)   | 0.557211(11) | 0.03052(13) | 0.470(7)<br>0.291(4)  | 0.761(7)          |
| Sn3<br>Bi3 | 8d   | 0 | 0.91382(5)   | 0.24109(3)   | 0.0496(4)   | 0.318(8)<br>0.149(4)  | 0.467(8)*         |
| Sn4<br>Bi4 | 4d   | 0 | 0            | 0            | 0.03356(13) | 0.379(11)<br>0.526(6) | 0.905(11)         |
| Sn5<br>Bi5 | 8d   | 0 | 0.456713(14) | 0.117269(7)  | 0.03116(9)  | 0.241(7)<br>0.721(4)  | 0.962(7)          |
| Se1        | 8d   | 0 | 0.09178(3)   | 0.083945(16) | 0.02735(14) | 1                     | 1                 |
| Se2        | 8d   | 0 | 0.17557(4)   | 0.64464(2)   | 0.03905(18) | 1                     | 1                 |
| Se3        | 8d   | 0 | 0.36279(3)   | 0.027132(14) | 0.02821(15) | 1                     | 1                 |
| Se4        | 8d   | 0 | 0.54594(3)   | 0.195491(17) | 0.03029(14) | 1                     | 1                 |
| Se5        | 4d   | 0 | 0.27297(5)   | 0.25         | 0.0317(2)   | 1                     | 1                 |

\* This site generates the split position between the NaCl-like slabs. The maximum occupancy is therefore limited to 0.5.

**Table S8:** Anisotropic displacement parameters (in Å<sup>2</sup>) of Sn<sub>3.6</sub>Bi<sub>3.6</sub>Se<sub>9</sub> at RT, defined as exp  $[-2\pi^2 (U_{11}h^2 a^{*2} + U_{22}k^2 b^{*2} + U_{33}l^2 c^{*2} + U_{12}hka^*b^* + U_{13}hla^*c^* + U_{23}klb^*c^*)]$ .

| Atom      | $U_{11}$    | $U_{22}$    | $U_{33}$    | $U_{12}$ | $U_{13}$ | $U_{23}$     |
|-----------|-------------|-------------|-------------|----------|----------|--------------|
| Sn1 / Bi1 | 0.02925(17) | 0.03174(17) | 0.03284(19) | 0        | 0        | 0.00018(10)  |
| Sn2 / Bi2 | 0.0290(2)   | 0.0284(2)   | 0.0342(2)   | 0        | 0        | -0.00116(13) |
| Sn3 / Bi3 | 0.0401(3)   | 0.0499(4)   | 0.0588(10)  | 0        | 0        | 0.0125(3)    |
| Sn4 / Bi4 | 0.0330(2)   | 0.0343(2)   | 0.0334(2)   | 0        | 0        | -0.00114(14) |
| Sn5 / Bi5 | 0.02860(15) | 0.03082(15) | 0.03406(16) | 0        | 0        | -0.00127(8)  |
| Se1       | 0.0268(2)   | 0.0281(2)   | 0.0272(3)   | 0        | 0        | 0.00062(18)  |
| Se2       | 0.0258(3)   | 0.0330(3)   | 0.0583(4)   | 0        | 0        | -0.0144(2)   |
| Se3       | 0.0269(3)   | 0.0271(2)   | 0.0306(3)   | 0        | 0        | 0.00115(19)  |
| Se4       | 0.0305(2)   | 0.0317(2)   | 0.0287(3)   | 0        | 0        | 0.00046(17)  |
| Se5       | 0.0336(3)   | 0.0323(3)   | 0.0291(4)   | 0        | 0        | 0            |

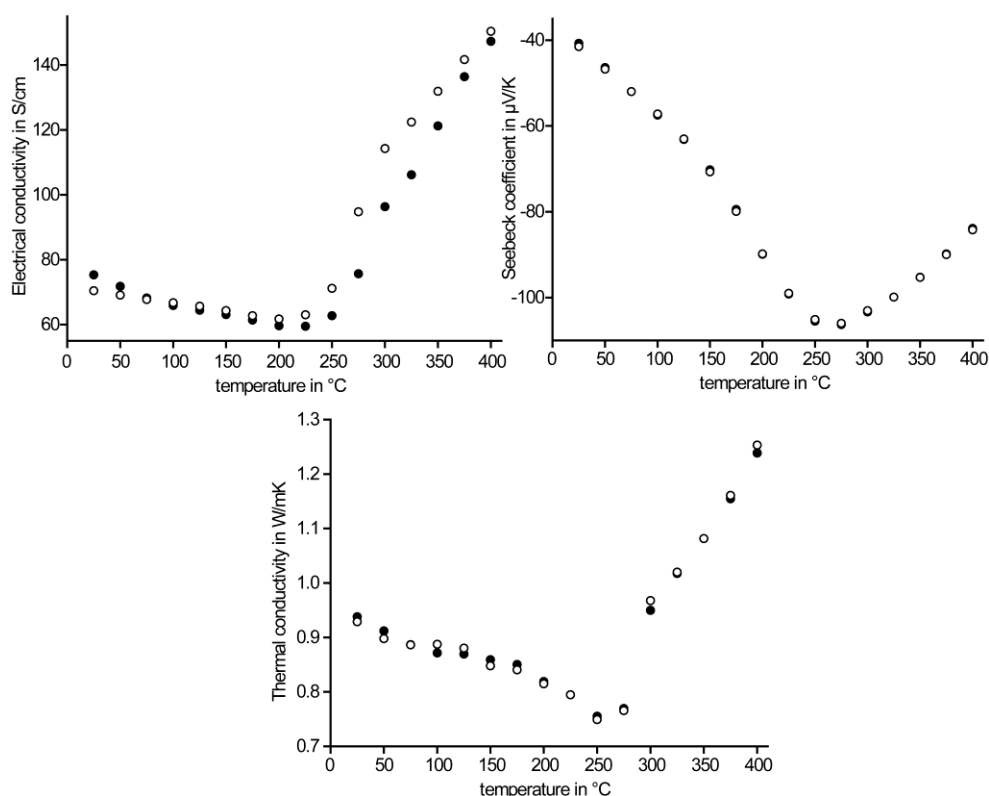

**Figure S10:** Thermoelectric characterization of Sn<sub>2</sub>Bi<sub>2</sub>Se<sub>5</sub> in the L4,4-lillianite type with full spheres for the averaged heating curved and empty spheres for the averaged cooling curved.

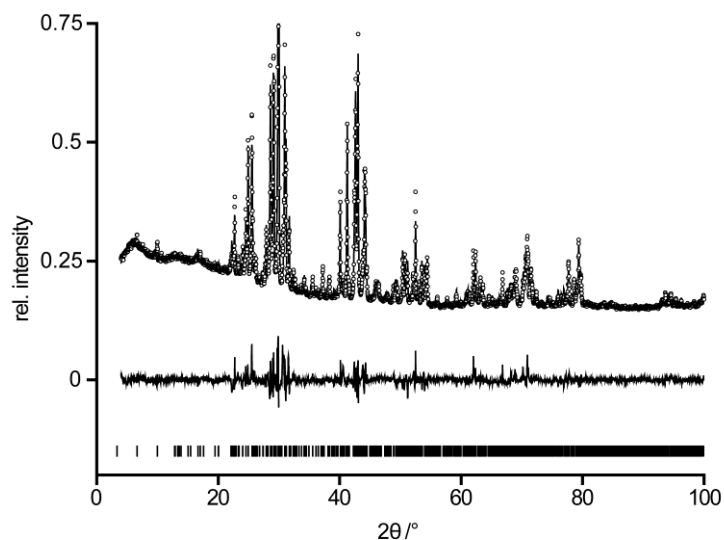

**Figure S11:** Rietveld refinement of a sample (annealed at 530 °C, then water-quenched) with the nominal composition  $(\text{SnSe})_{1.86}\text{Bi}_2\text{Se}_3$  (strongest reflection truncated at 75 % of max. intensity), data points drawn as circles, calculated data as black line; difference plot as black line below; reflection positions indicated by vertical lines; L4,7 model taken from the single crystal refinement of  $\text{Sn}_{11.49}\text{Bi}_{12.39}\text{Se}_{30}$  (cf. Tables 6 and S9; cell parameters refined, atom coordinates fixed, refined overall isotropic displacement for anions and cations each);  $R_p = 0.024$ ,  $R_{wp} = 0.038$ , GooF = 1.545 (preferred orientation taken into account by 8<sup>th</sup> order spherical harmonics with individual sets of parameters; crystallite size and microstrain by a Lorentzian function).

**Table S9:** Atom positions, site occupancies and equivalent isotropic displacement parameters (in Å<sup>2</sup>) of Sn<sub>11.49</sub>Bi<sub>12.39</sub>Se<sub>30</sub> at RT;  $U_{eq} = 1/3 [U_{22} + 1/\sin^2\beta \cdot (U_{11} + U_{33} + 2U_{13} \cdot \cos\beta)]$ .

| Atom         | Site | x           | y   | z            | $U_{eq}$    | s.o.f.                | overall occupancy |
|--------------|------|-------------|-----|--------------|-------------|-----------------------|-------------------|
| Bi1<br>Sn1   | 4d   | 0.07005(2)  | 0.5 | 0.141175(10) | 0.02552(9)  | 0.759(16)<br>0.21(3)  | 0.97(3)           |
| Bi2<br>Sn2   | 4d   | 0.13068(2)  | 0.5 | 0.460970(10) | 0.02280(9)  | 0.624(6)<br>0.330(10) | 0.954(10)         |
| Bi3<br>Sn3   | 2d   | 0           | 0   | 0            | 0.0300(2)   | 0.552(9)<br>0.35(2)   | 0.902(9)          |
| Bi4<br>Sn4   | 4d   | 0.28113(3)  | 0   | 0.068288(16) | 0.02496(14) | 0.330(6)<br>0.407(10) | 0.737(10)         |
| Bi5<br>Sn5   | 4d   | 0.89381(2)  | 0   | 0.393771(12) | 0.02533(10) | 0.523(6)<br>0.404(10) | 0.927(10)         |
| Bi6<br>Sn6   | 4d   | 0.86202(3)  | 0   | 0.207953(13) | 0.02516(11) | 0.428(5)<br>0.495(10) | 0.923(10)         |
| Bi7a<br>Sn7a | 4d   | 0.14645(14) | 0   | 0.31380(19)  | 0.0446(7)   | 0.078(7)<br>0.451(16) | 1.01(2)           |
| Bi7b<br>Sn7b | 4d   | 0.14368(13) | 0   | 0.2890(2)    | 0.0487(9)   | 0.079(8)<br>0.400(16) |                   |
| Se8          | 4d   | 0.92760(4)  | 0   | 0.10109(2)   | 0.0197(2)   | 1                     | 1                 |
| Se9          | 2d   | 0           | 0   | 0.5          | 0.0206(2)   | 1                     | 1                 |
| Se10         | 4d   | 0.20920(5)  | 0   | 0.17447(3)   | 0.0336(2)   | 1                     | 1                 |
| Se11         | 4d   | 0.25176(5)  | 0   | 0.42492(3)   | 0.0295(2)   | 1                     | 1                 |
| Se12         | 4d   | 0.78336(5)  | 0   | 0.30005(2)   | 0.0264(2)   | 1                     | 1                 |
| Se13         | 4d   | 0.02230(5)  | 0.5 | 0.36742(2)   | 0.02291(15) | 1                     | 1                 |
| Se14         | 4d   | 0.99936(5)  | 0.5 | 0.23563(2)   | 0.0229(2)   | 1                     | 1                 |
| Se15         | 4d   | 0.14354(4)  | 0.5 | 0.03273(2)   | 0.0210(2)   | 1                     | 1                 |

**Table S10:** Anisotropic displacement parameters (in Å<sup>2</sup>) of Sn<sub>11.49</sub>Bi<sub>12.39</sub>Se<sub>30</sub> at RT, defined as  $\exp [-2\pi^2 (U_{11}h^2 a^{*2} + U_{22}k^2 b^{*2} + U_{33}l^2 c^{*2} + U_{12}hka^*b^* + U_{13}hla^*c^* + U_{23}klb^*c^*)]$ .

| Atom      | $U_{11}$    | $U_{22}$    | $U_{33}$    | $U_{12}$ | $U_{13}$    | $U_{23}$ |
|-----------|-------------|-------------|-------------|----------|-------------|----------|
| Bi1/Sn1   | 0.02592(16) | 0.0223(2)   | 0.02880(15) | 0        | 0.00495(10) | 0        |
| Bi2/Sn2   | 0.02132(16) | 0.0203(2)   | 0.02692(15) | 0        | 0.00291(10) | 0        |
| Bi3/Sn3   | 0.0323(3)   | 0.0277(3)   | 0.0304(3)   | 0        | 0.0052(2)   | 0        |
| Bi4/Sn4   | 0.0227(3)   | 0.0228(2)   | 0.0293(2)   | 0        | 0.0024(2)   | 0        |
| Bi5/Sn5   | 0.02404(18) | 0.02265(17) | 0.02960(17) | 0        | 0.00422(12) | 0        |
| Bi6/Sn6   | 0.0245(2)   | 0.02238(18) | 0.02848(18) | 0        | 0.00201(13) | 0        |
| Bi7a/Sn7a | 0.0468(7)   | 0.0384(6)   | 0.0498(17)  | 0        | 0.0101(7)   | 0        |
| Bi7b/Sn7b | 0.0487(8)   | 0.0353(7)   | 0.060(2)    | 0        | -0.0036(8)  | 0        |
| Se8       | 0.0198(3)   | 0.0188(3)   | 0.0201(2)   | 0        | 0.0008(2)   | 0        |
| Se9       | 0.0230(4)   | 0.0192(3)   | 0.0203(3)   | 0        | 0.0052(3)   | 0        |
| Se10      | 0.0232(3)   | 0.0176(3)   | 0.0570(4)   | 0        | -0.0112(3)  | 0        |
| Se11      | 0.0240(3)   | 0.0185(3)   | 0.0485(4)   | 0        | 0.0155(3)   | 0        |
| Se12      | 0.0270(3)   | 0.0263(3)   | 0.0259(3)   | 0        | 0.0035(2)   | 0        |
| Se13      | 0.0218(3)   | 0.0221(3)   | 0.0251(3)   | 0        | 0.0034(2)   | 0        |
| Se14      | 0.0239(3)   | 0.0231(3)   | 0.0215(2)   | 0        | 0.0018(2)   | 0        |
| Se15      | 0.0199(3)   | 0.0187(3)   | 0.0240(3)   | 0        | 0.0010(2)   | 0        |

**Table S11:** Atom positions, site occupancies and equivalent isotropic displacement parameters (in Å<sup>2</sup>) of Sn<sub>2.22</sub>Bi<sub>2.52</sub>Se<sub>6</sub> at RT,  $U_{eq} = 1/3 \cdot [U_{11} + U_{22} + U_{33}]$ .

| Atom         | Site | x           | y    | z           | $U_{eq}$  | Occupancy              | overall occupancy    |
|--------------|------|-------------|------|-------------|-----------|------------------------|----------------------|
| Bi1<br>Sn1   | 2d   | 0.04893(4)  | 0.25 | 0.38866(8)  | 0.0222(2) | 0.6555(6)<br>0.3445(6) | 1.0<br>(constrained) |
| Bi2<br>Sn2   | 2d   | 0.13565(4)  | 0.75 | 0.16529(9)  | 0.0248(3) | 0.5304(8)<br>0.4694(9) | 0.9998(9)            |
| Bi3<br>Sn3   | 2d   | 0.95145(4)  | 0.25 | 0.11162(8)  | 0.0224(3) | 0.5567(6)<br>0.4433(6) | 1.0<br>(constrained) |
| Bi4<br>Sn4   | 2d   | 0.13129(5)  | 0.25 | 0.66363(10) | 0.0239(3) | 0.4170(8)<br>0.4545(9) | 0.8715(9)            |
| Bi5a<br>Sn5a | 2d   | 0.2319(2)   | 0.25 | 0.9326(4)   | 0.0421(9) | 0.2022(9)<br>0.2486(9) | 0.8689(9)            |
| Bi5b<br>Sn5b | 2d   | 0.2568(3)   | 0.25 | 0.9250(5)   | 0.058(2)  | 0.1601(9)<br>0.2580(9) |                      |
| Se6          | 2d   | 0.16865(9)  | 0.25 | 0.29901(17) | 0.0253(5) | 1                      | 1                    |
| Se7          | 2d   | 0.00057(12) | 0.75 | 0.2477(3)   | 0.0219(3) | 1                      | 1                    |
| Se8          | 2d   | 0.83461(9)  | 0.25 | 0.20255(16) | 0.0238(5) | 1                      | 1                    |
| Se9          | 2d   | 0.09576(11) | 0.25 | 0.0168(2)   | 0.0312(5) | 1                      | 1                    |
| Se10         | 2d   | 0.25193(11) | 0.75 | 0.06892(10) | 0.0285(3) | 1                      | 1                    |
| Se11         | 2d   | 0.09016(10) | 0.75 | 0.51786(19) | 0.0292(5) | 1                      | 1                    |

**Table S12:** Anisotropic displacement parameters (in Å<sup>2</sup>) of Sn<sub>2.22</sub>Bi<sub>2.52</sub>Se<sub>6</sub> at RT, defined as  $\exp [-2\pi^2 (U_{11}h^2 a^{*2} + U_{22}k^2 b^{*2} + U_{33}l^2 c^{*2} + U_{12}hka^*b^* + U_{13}hla^*c^* + U_{23}klb^*c^*)]$ .

| Atom      | $U_{11}$   | $U_{22}$   | $U_{33}$   | $U_{12}$ | $U_{13}$   | $U_{23}$ |
|-----------|------------|------------|------------|----------|------------|----------|
| Bi1/Sn1   | 0.0271(4)  | 0.0187(6)  | 0.0207(5)  | 0        | 0.0002(3)  | 0        |
| Bi2/Sn2   | 0.0302(5)  | 0.0207(6)  | 0.0236(6)  | 0        | -0.0012(4) | 0        |
| Bi3/Sn3   | 0.0260(4)  | 0.0186(6)  | 0.0226(5)  | 0        | -0.0015(3) | 0        |
| Bi4/Sn4   | 0.0276(5)  | 0.0208(8)  | 0.0232(7)  | 0        | -0.0004(4) | 0        |
| Bi5a/Sn5a | 0.0437(15) | 0.038(2)   | 0.0451(19) | 0        | 0.011(2)   | 0        |
| Bi5b/Sn5b | 0.084(4)   | 0.036(2)   | 0.054(2)   | 0        | 0.027(4)   | 0        |
| Se6       | 0.0244(8)  | 0.0244(14) | 0.0271(13) | 0        | -0.0003(7) | 0        |
| Se7       | 0.0216(5)  | 0.0191(6)  | 0.0250(6)  | 0        | -0.0036(4) | 0        |
| Se8       | 0.0252(8)  | 0.0227(13) | 0.0234(12) | 0        | -0.0007(7) | 0        |
| Se9       | 0.0525(12) | 0.0181(14) | 0.0231(12) | 0        | -0.0091(9) | 0        |
| Se10      | 0.0292(6)  | 0.0279(7)  | 0.0285(6)  | 0        | 0.0038(11) | 0        |
| Se11      | 0.0442(11) | 0.0194(14) | 0.0239(11) | 0        | -0.0098(9) | 0        |



**Table S13:** Atom positions, site occupancies and equivalent isotropic displacement parameters (in Å<sup>2</sup>) of Sn<sub>9.52</sub>Bi<sub>10.96</sub>Se<sub>26</sub> at RT;  $U_{eq} = 1/3 [U_{22} + 1/\sin^2\beta \cdot (U_{11} + U_{33} + 2U_{13} \cdot \cos\beta)]$ .

| Atom         | Site | x          | y   | z          | $U_{eq}$    | Occupancy             | overall occupancy    |
|--------------|------|------------|-----|------------|-------------|-----------------------|----------------------|
| Bi1<br>Sn1   | 2d   | 0.14995(4) | 0   | 0.54479(3) | 0.02237(16) | 0.437(2)<br>0.563(2)  | 1.0<br>(constrained) |
| Bi2<br>Sn2   | 4d   | 0          | 0   | 0          | 0.0233(4)   | 0.144(12)<br>0.441(7) | 0.585(12)            |
| Bi3<br>Sn3   | 2d   | 0.49428(4) | 0   | 0.16127(3) | 0.0248(2)   | 0.430(6)<br>0.529(4)  | 0.959(6)             |
| Bi4<br>Sn4   | 2d   | 0.75263(4) | 0   | 0.08414(3) | 0.0252(2)   | 0.050(6)<br>0.823(4)  | 0.873(6)             |
| Bi5<br>Sn5   | 2d   | 0.55408(4) | 0   | 0.37756(3) | 0.02387(18) | 0.565(2)<br>0.435(2)  | 1.0<br>(constrained) |
| Bi6a<br>Sn6a | 2d   | 0.2652(2)  | 0   | 0.2824(3)  | 0.0459(9)   | 0.623(7)<br>0.022(6)  | 0.996(7)             |
| Bi6b<br>Sn6b | 2d   | 0.2517(4)  | 0   | 0.2560(3)  | 0.0415(12)  | 0.203(7)<br>0.148(6)  |                      |
| Se7          | 2d   | 0.08739(9) | 0   | 0.65320(6) | 0.0237(3)   | 1                     | 1                    |
| Se8a         | 2d   | 0.1222(15) | 0   | 0.1171(11) | 0.022(2)    | 0.59(10)              | 1.0<br>(constrained) |
| Se8b         | 2d   | 0.140(2)   | 0   | 0.133(2)   | 0.027(3)    | 0.41(10)              |                      |
| Se9          | 2d   | 0.13055(9) | 0   | 0.80592(6) | 0.0234(3)   | 1                     | 1                    |
| Se10         | 2d   | 0.21088(9) | 0   | 0.41436(8) | 0.0305(3)   | 1                     | 1                    |
| Se11         | 2d   | 0.37515(8) | 0   | 0.03943(5) | 0.0204(2)   | 1                     | 1                    |
| Se12         | 4d   | 0          | 0.5 | 0.5        | 0.0212(3)   | 1                     | 1                    |
| Se13         | 2d   | 0.61927(9) | 0   | 0.26934(6) | 0.0256(3)   | 1                     | 1                    |

**Table S14:** Anisotropic displacement parameters (in Å<sup>2</sup>) of Sn<sub>9.52</sub>Bi<sub>10.96</sub>Se<sub>26</sub> at RT, defined as  $\exp [-2\pi^2 (U_{11}h^2 a^{*2} + U_{22}k^2 b^{*2} + U_{33}l^2 c^{*2} + U_{12}hka^*b^* + U_{13}hla^*c^* + U_{23}klb^*c^*)]$ .

| Atom      | $U_{11}$   | $U_{22}$   | $U_{33}$  | $U_{12}$ | $U_{13}$    | $U_{23}$ |
|-----------|------------|------------|-----------|----------|-------------|----------|
| Bi1/Sn1   | 0.0212(3)  | 0.0193(3)  | 0.0266(3) | 0        | 0.0038(2)   | 0        |
| Bi2/Sn2   | 0.0215(6)  | 0.0217(7)  | 0.0277(7) | 0        | 0.0065(4)   | 0        |
| Bi3/Sn3   | 0.0247(3)  | 0.0210(3)  | 0.0288(4) | 0        | 0.0043(2)   | 0        |
| Bi4/Sn4   | 0.0249(3)  | 0.0223(3)  | 0.0279(3) | 0        | 0.0023(2)   | 0        |
| Bi5/Sn5   | 0.0239(3)  | 0.0212(3)  | 0.0265(3) | 0        | 0.0038(2)   | 0        |
| Bi6a/Sn6a | 0.0407(11) | 0.0322(12) | 0.061(2)  | 0        | -0.0053(13) | 0        |
| Bi6b/Sn6b | 0.0418(19) | 0.0297(15) | 0.056(3)  | 0        | 0.0165(19)  | 0        |
| Se7       | 0.0236(5)  | 0.0225(6)  | 0.0246(6) | 0        | 0.0020(4)   | 0        |
| Se8a      | 0.021(3)   | 0.0176(14) | 0.028(4)  | 0        | 0.009(3)    | 0        |
| Se8b      | 0.024(4)   | 0.020(2)   | 0.037(8)  | 0        | 0.008(5)    | 0        |
| Se9       | 0.0251(5)  | 0.0234(7)  | 0.0219(6) | 0        | 0.0041(4)   | 0        |
| Se10      | 0.0206(5)  | 0.0184(6)  | 0.0496(9) | 0        | -0.0040(5)  | 0        |
| Se11      | 0.0212(5)  | 0.0188(6)  | 0.0215(6) | 0        | 0.0044(4)   | 0        |
| Se12      | 0.0224(7)  | 0.0191(8)  | 0.0211(8) | 0        | 0.0003(6)   | 0        |
| Se13      | 0.0266(6)  | 0.0258(7)  | 0.0242(6) | 0        | 0.0036(5)   | 0        |

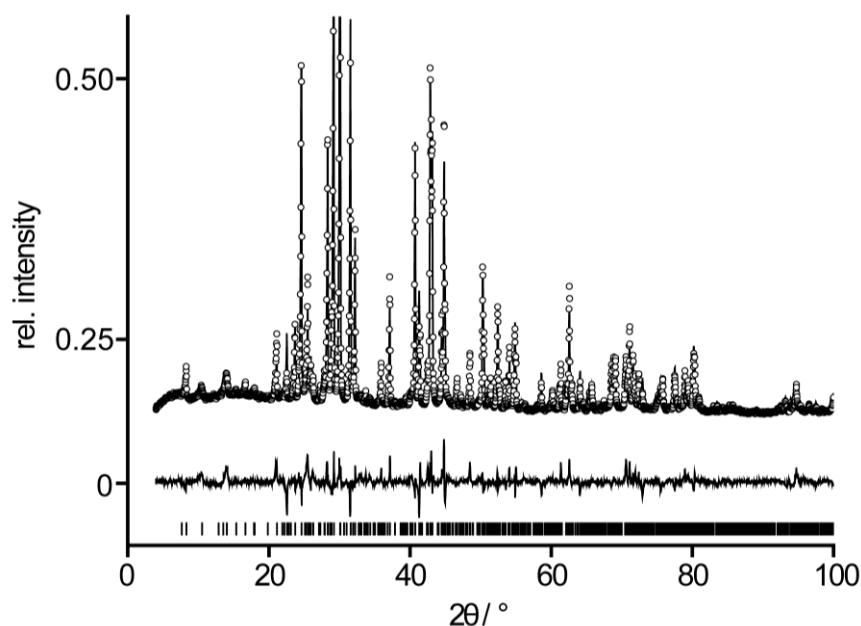

**Figure S12:** Rietveld refinement of a sample (annealed at 620 °C, then water-quenched) with the nominal composition  $(\text{SnSe})_2\text{Bi}_2\text{Se}_3$  (strongest reflection truncated at 55 % of max. intensity), data points drawn as circles, calculated data as black line; difference plot as black line below; reflection positions indicated by vertical lines; L4,4 model taken from the single crystal refinement of  $\text{Sn}_{11.49}\text{Bi}_{12.39}\text{Se}_{30}$  (cf. Tables 7 and S11; cell parameters refined, atom coordinates fixed, refined overall isotropic displacement for anions and cations each);  $R_p = 0.027$ ,  $R_{wp} = 0.042$ ,  $\text{GooF} = 1.615$  (preferred orientation taken into account by 6<sup>th</sup> order spherical harmonics with individual sets of parameters; crystallite size by a Lorentzian function and microstrain by convolution of a Gaussian and a Lorentzian function).

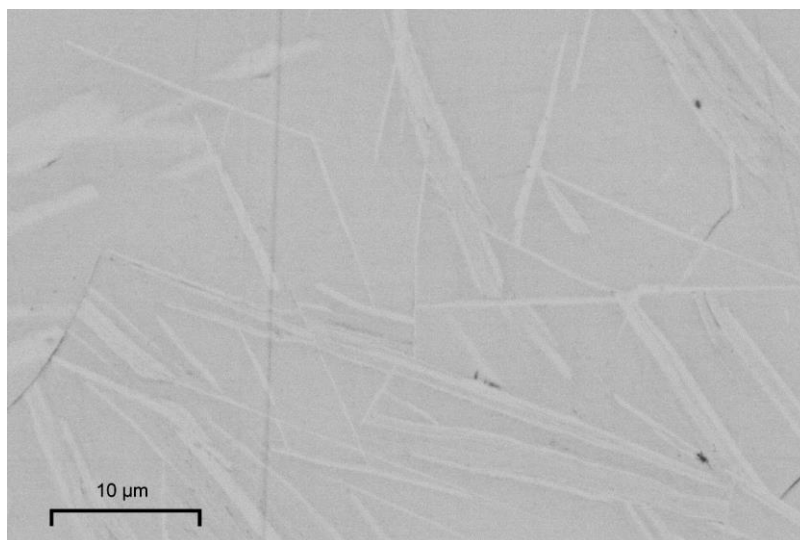

**Figure S13:** Backscattered electron SEM image of a sample with the nominal composition  $\text{Sn}_2\text{Bi}_2\text{Se}_5$  after heating cycles of transport measurements with light gray areas showing the Bi-enriched phase (phase 1) and the dark gray areas showing the Sn-enriched phase (phase 2).

**Table S15:** Results of the chemical analyses of the sample (nominal composition:  $\text{Sn}_2\text{Bi}_2\text{Se}_5$ ) shown in Fig. S13 (phase assignment according to Fig. S13).

|                            | SEM-EDX                                                                      | TEM-EDX                                      |
|----------------------------|------------------------------------------------------------------------------|----------------------------------------------|
| Phase 1 (bismuth-enriched) | $\text{Sn}_{16(1)}\text{Bi}_{28(1)}\text{Se}_{56(1)}$ (from 3 points)        | $\text{Sn}_{15}\text{Bi}_{25}\text{Se}_{60}$ |
| Phase 2 (tin-enriched)     | $\text{Sn}_{23.6(8)}\text{Bi}_{22.8(7)}\text{Se}_{53.6(3)}$ (from 10 points) | $\text{Sn}_{22}\text{Bi}_{19}\text{Se}_{59}$ |

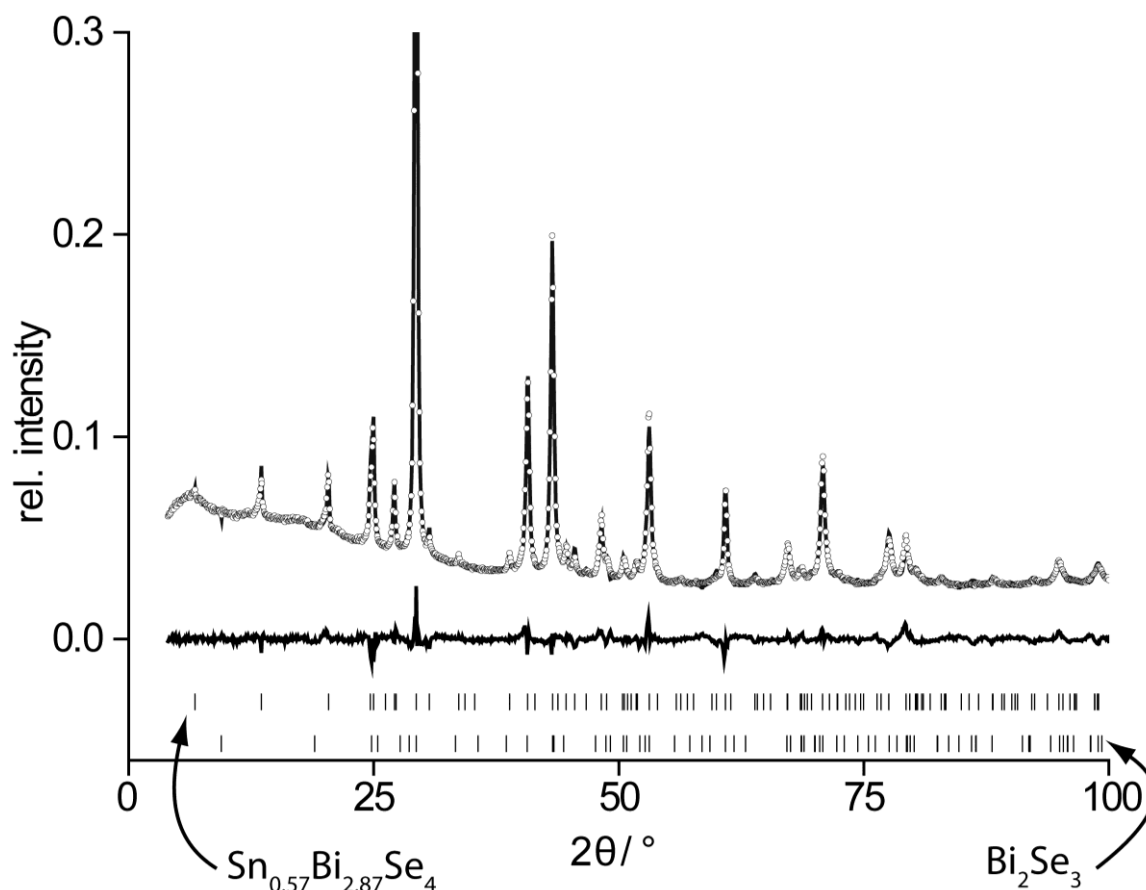

**Figure S14:** Rietveld refinement of sample with the nominal composition  $(\text{SnSe})_{0.5}\text{Bi}_2\text{Se}_3$  (annealed at 620 °C, then air-quenched); strongest reflection truncated at 30 % of max. intensity, data points drawn as circles, calculated data as black line; difference plot as black line below; reflection positions indicated by vertical lines for  $\text{Sn}_{0.571}\text{Bi}_{2.286}\text{Se}_4$  (top row) and  $\text{Bi}_2\text{Se}_3$  (bottom row).

**Table S16:** Results of the Rietveld refinement for a sample with the nominal composition (annealed at 620 °C, then air-quenched).

|                                         |                                                            |                                                            |
|-----------------------------------------|------------------------------------------------------------|------------------------------------------------------------|
| formula                                 | $\text{Sn}_{0.584}\text{Bi}_{2.277}\text{Se}_4$            | $\text{Bi}_2\text{Se}_3$                                   |
| phase fraction                          | 95 wt-%                                                    | 5 wt-%                                                     |
| formula mass                            | 2584.05 g mol <sup>-1</sup>                                | 654.84 g mol <sup>-1</sup>                                 |
| crystal system                          | trigonal                                                   | trigonal                                                   |
| space group                             | $R\bar{3}m$                                                | $R\bar{3}m$                                                |
| cell parameter                          | $a = 4.1821(2) \text{ \AA}$<br>$c = 39.178(4) \text{ \AA}$ | $a = 4.1798(3) \text{ \AA}$<br>$c = 28.026(5) \text{ \AA}$ |
| cell volume                             | 593.42(8) Å <sup>3</sup>                                   | 424.0(1) Å <sup>3</sup>                                    |
| Z                                       | 3                                                          | 3                                                          |
| X-ray density                           | 7.23 g cm <sup>-3</sup>                                    | 7.69 g cm <sup>-3</sup>                                    |
| R <sub>Bragg</sub>                      | 0.015                                                      | 0.044                                                      |
| radiation                               | Cu-Kα1 ( $\lambda = 1.54051 \text{ \AA}$ )                 |                                                            |
| 2θ range                                | 4° < 2θ < 100°                                             |                                                            |
| refined parameters                      | 45 (thereof 24 for background)                             |                                                            |
| R <sub>p</sub> / R <sub>wp</sub> / GooF | 0.024 / 0.034 / 1.616                                      |                                                            |

**Tab. S17:** Coordinates, site occupancies and equivalent isotropic displacement parameters of  $\text{Sn}_{0.584}\text{Bi}_{2.277}\text{Se}_4$  and  $\text{Bi}_2\text{Se}_3$  as obtained in the Rietveld refinement (cf. Figure S14 and Table S16).\*

| Atom                                                    | Wyckoff position | x   | y   | z         | s.o.f.    | $B_{\text{iso}} / \text{\AA}^2$ |
|---------------------------------------------------------|------------------|-----|-----|-----------|-----------|---------------------------------|
| Sn <sub>0.571</sub> Bi <sub>2.286</sub> Se <sub>4</sub> |                  |     |     |           |           |                                 |
| Se1                                                     | 6 <i>d</i>       | 1/3 | 2/3 | 0.5325(3) | 1         | 1.1(1)                          |
| Se2                                                     | 6 <i>d</i>       | 1/3 | 2/3 | 0.3773(4) | 1         | 1.1(1)                          |
| Bi1                                                     | 12 <i>d</i>      | 1/3 | 2/3 | 2/3       | 0.443 *** | 1.1(1)                          |
| Sn1                                                     |                  |     |     |           | 0.418 *** |                                 |
| Bi2                                                     | 6 <i>d</i>       | 1/3 | 2/3 | 0.2386(2) | 0.917 *** | 1.1(1)                          |
| Sn2                                                     |                  |     |     |           | 0.083 *** |                                 |
| Bi <sub>2</sub> Se <sub>3</sub>                         |                  |     |     |           |           |                                 |
| Se1                                                     | 6 <i>c</i>       | 0   | 0   | 0.190(1)  | 1         | 1 **                            |
| Bi1                                                     | 6 <i>c</i>       | 0   | 0   | 0.391(5)  | 1         | 1 **                            |
| Se2                                                     | 3 <i>a</i>       | 0   | 0   | 0         | 1         | 1 **                            |

\* Peak broadening due to microstrain was taken into account by a Lorentzian function for  $\text{Sn}_{0.571}\text{Bi}_{2.286}\text{Se}_4$  and a Gaussian function for  $\text{Bi}_2\text{Se}_3$ . Preferred orientation was taken into account by spherical harmonics of the eighth order for  $\text{Sn}_{1.71}\text{Bi}_{6.86}\text{Se}_{12}$  and of the sixth order for  $\text{Bi}_2\text{Se}_3$  with an individual set of parameters each.

\*\* Displacement parameters were not refined as  $\text{Bi}_2\text{Se}_3$  is a side phase with only  $\approx 5$  wt-%.

\*\*\* s.o.f.'s for  $\text{Sn}_{0.584}\text{Bi}_{2.277}\text{Se}_4$  are derived from the results of the single crystal refinement of  $\text{Sn}_{0.571}\text{Bi}_{2.286}\text{Se}_4$  according to the exsolution of  $\text{Bi}_2\text{Se}_3$  based on the following reaction equation:  $\text{Sn}_{0.571}\text{Bi}_{2.286}\text{Se}_4 \rightarrow 0.95 \text{Sn}_{0.584}\text{Bi}_{2.277}\text{Se}_4 + 0.5 \text{Bi}_2\text{Se}_3$ . The alteration of the composition compared to  $\text{Sn}_{0.571}\text{Bi}_{2.286}\text{Se}_4$  was assumed on position Bi1/Sn1.

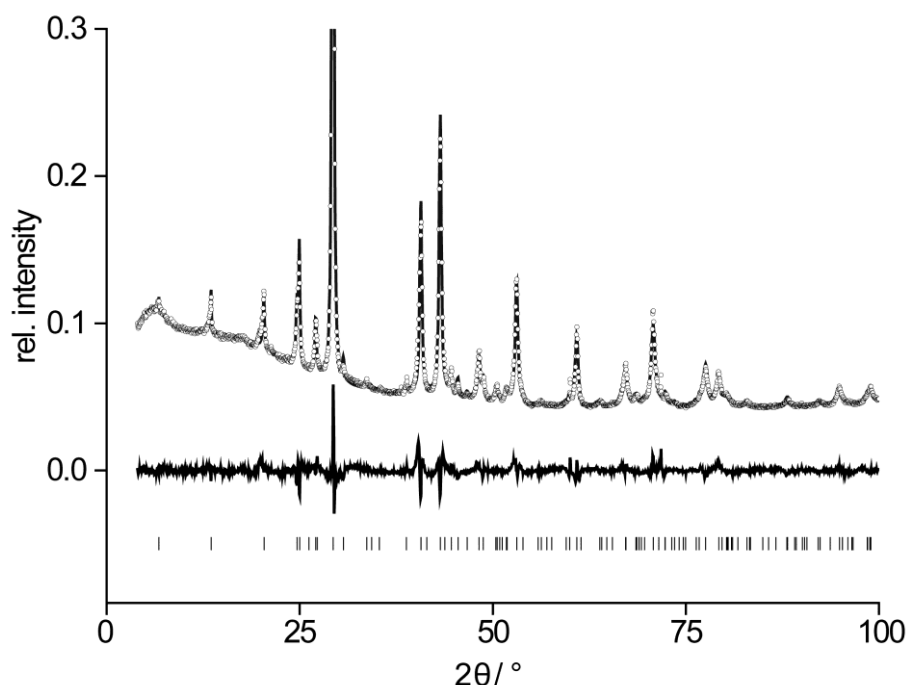

**Figure S15:** Rietveld refinement of the  $\sim 3$  g sample (annealed at 500 °C for 9 d, then water-quenched) with the composition  $\text{SnBi}_4\text{Se}_7 = (\text{SnSe})_{0.5}\text{Bi}_2\text{Se}_3$  used for thermoelectric measurements (the strongest reflection truncated at 30 % of max. intensity): data points drawn as circles, calculated data as black line; difference plot as black line below; reflection positions indicated by vertical lines for  $\text{Sn}_{0.571}\text{Bi}_{2.286}\text{Se}_4$  (top row) and  $\text{Bi}_2\text{Se}_3$  (bottom row).

**Table S18:** Results of the Rietveld refinement of the ~3 g sample of  $\text{Sn}_{0.571}\text{Bi}_{2.286}\text{Se}_4$  (annealed at 500 °C for 9 d, then water-quenched).

|                         |                                                            |
|-------------------------|------------------------------------------------------------|
| formula                 | $\text{Sn}_{0.571}\text{Bi}_{2.286}\text{Se}_4$            |
| formula mass            | 2584.05 g mol <sup>-1</sup>                                |
| crystal system          | trigonal                                                   |
| space group             | $R\bar{3}m$                                                |
| lattice parameters *    | $a = 4.1831(2) \text{ \AA}$<br>$c = 39.181(4) \text{ \AA}$ |
| cell volume             | 593.73(9) Å <sup>3</sup>                                   |
| X-ray density           | 7.23 g cm <sup>-3</sup>                                    |
| Z                       | 3                                                          |
| radiation               | Cu- $K_{\alpha 1}$ ( $\lambda = 1.54051 \text{ \AA}$ )     |
| 2 $\theta$ range        | 4° < 2 $\theta$ < 100°                                     |
| refined parameters      | 45, thereof 24 for background                              |
| $R_p$ / $R_{wp}$ / GooF | 0.024 / 0.035 / 1.589                                      |
| $R_{\text{Bragg}}$      | 0.012                                                      |

\* Deviations from the cell parameters determined for the single crystal may arise from different cooling rates.

**Table S19:** Coordinates, site occupancies and equivalent isotropic displacement parameters of annealed  $\text{Sn}_{0.571}\text{Bi}_{2.286}\text{Se}_4$ .

| Atom       | Wyckoff position | x   | y   | z         | s.o.f. *       | $B_{\text{iso}} / \text{\AA}^2$ |
|------------|------------------|-----|-----|-----------|----------------|---------------------------------|
| Se1        | 6d               | 1/3 | 2/3 | 0.5305(3) | 1              | 0.74(9)                         |
| Se2        | 6d               | 1/3 | 2/3 | 0.3753(4) | 1              | 0.74(9)                         |
| Bi1<br>Sn1 | 12d              | 1/3 | 2/3 | 2/3       | 0.452<br>0.405 | 0.74(9)                         |
| Bi2<br>Sn2 | 6d               | 1/3 | 2/3 | 0.2387(2) | 0.917<br>0.083 | 0.74(9)                         |

\* s.o.f.'s taken from single crystal refinement.

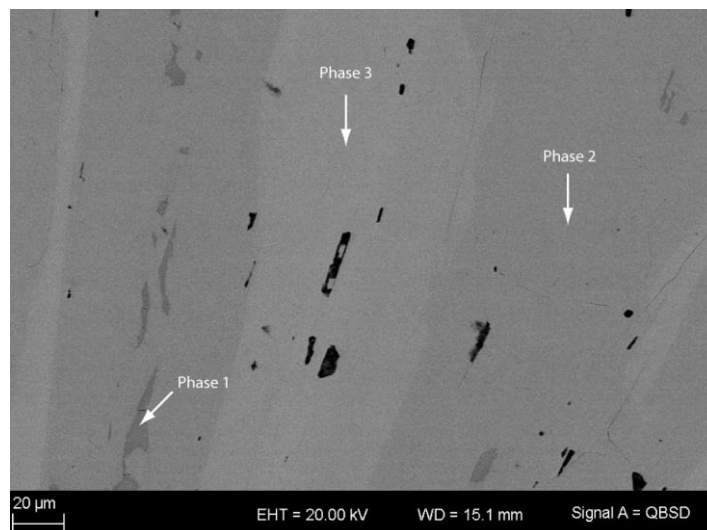

**Figure S16:** SEM-BSE image of a thermally treated sample (3 times cycled up to 500 °C) with the nominal composition  $\text{SnBi}_4\text{Se}_7$ . The image shows the presence of 2 majority and one minority phase after the thermal treatment during the thermoelectric measurements.

**Table S20:** SEM-EDX analyses for the sample with the nominal composition  $\text{SnBi}_4\text{Se}_7$  after thermal treatment (3 times cycled up to 500 °C).

| Element   | nominal | Phase 1<br>(minority phase) | Phase 2<br>(majority phase) | Phase 3<br>(majority phase) |
|-----------|---------|-----------------------------|-----------------------------|-----------------------------|
| Sn / at-% | 8.3%    | 21.9(6)                     | 9.6(5)                      | 5.6(5)                      |
| Bi / at-% | 33.3%   | 24.3(4)                     | 35.9(3)                     | 39.9(4)                     |
| Se / at-% | 58.3%   | 53.8(9)                     | 54.5(10)                    | 54.6(10)                    |

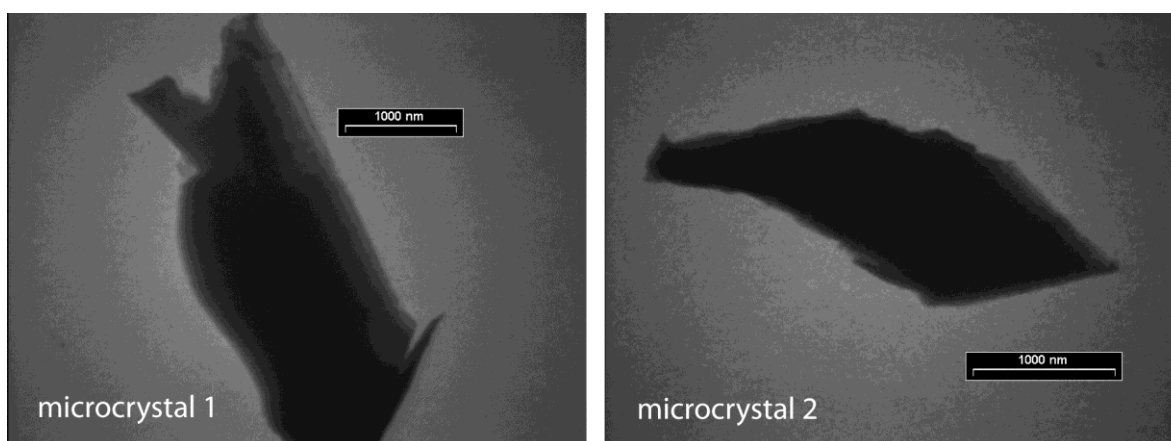

**Figure S17:** TEM images of two crystallites from a thermally treated sample (3 times cycled up to 500 °C) with the nominal composition  $\text{SnBi}_4\text{Se}_7$ .

**Table S21:** TEM-EDX analyses for the microcrystals from  $\text{SnBi}_4\text{Se}_7$  after the thermal treatment (3 times cycled up to 500 °C).

| Element   | microcrystal 1 | microcrystal 2 |
|-----------|----------------|----------------|
| Sn / at-% | 10.1(9)        | 7.1(8)         |
| Bi / at-% | 30.5(6)        | 34.5(8)        |
| Se / at-% | 59.3(9)        | 58.4(6)        |

**Table S22:** Crystallographic data and structure refinement of Sn<sub>0.85</sub>Bi<sub>2.15</sub>Se<sub>4</sub> (microcrystal 1 in Figure S17).\*

|                                                       |                                                                                                                 |
|-------------------------------------------------------|-----------------------------------------------------------------------------------------------------------------|
| formula                                               | Sn <sub>0.85</sub> Bi <sub>2.15</sub> Se <sub>4</sub>                                                           |
| formula mass                                          | 2597.3 g mol <sup>-1</sup>                                                                                      |
| crystal system                                        | trigonal                                                                                                        |
| space group                                           | <i>R</i> 3 <i>m</i>                                                                                             |
| cell parameters                                       | <i>a</i> = 4.1829(2) Å<br><i>c</i> = 39.158(3) Å                                                                |
| cell volume                                           | 593.34(6) Å <sup>3</sup>                                                                                        |
| X-ray density                                         | 7.2689 g cm <sup>-3</sup>                                                                                       |
| <i>Z</i>                                              | 3                                                                                                               |
| absorption coefficient                                | 8.096 mm <sup>-1</sup>                                                                                          |
| <i>F</i> (000)                                        | 1071                                                                                                            |
| radiation                                             | synchrotron radiation (0.29470 Å)                                                                               |
| 2θ range                                              | 4.68° < 2θ < °26.2                                                                                              |
| absorption correction                                 | semiempirical from equivalents<br>(SADABS Version 2.05, Bruker AXS Inc., Madison, Wisconsin, USA, <b>2001</b> ) |
| measured reflections                                  | 2282                                                                                                            |
| independent data                                      | 254 [233 with <i>I</i> > 2σ( <i>I</i> )]                                                                        |
| parameter                                             | 19                                                                                                              |
| weighting scheme                                      | <i>w</i> = 1/[σ <sup>2</sup> <i>F</i> <sub>o</sub> + 0.0001 <i>F</i> <sup>2</sup> ]                             |
| <i>R</i> 1 / <i>wR</i> 2 [ <i>I</i> > 2σ( <i>I</i> )] | 0.0278 / 0.0343                                                                                                 |
| <i>R</i> 1 / <i>wR</i> 2 (all data)                   | 0.0319 / 0.0371                                                                                                 |
| GooF (all data)                                       | 1.54                                                                                                            |
| Δρ <sub>min</sub> / Δρ <sub>max</sub>                 | -1.37 eÅ <sup>-3</sup> / 1.72 eÅ <sup>-3</sup>                                                                  |

\* The initial refinement was based on the structure model described in Section 3.3.2 with Sn and Bi restricted to the same atom positions and displacement parameters when sharing one site. However, a refinement constrained to charge neutrality yielded occupancies of both cation positions of ~1 resulting in a rather Sn-rich sum formula (Sn<sub>0.85</sub>Bi<sub>2.15</sub>Se<sub>4</sub> = Sn<sub>12.1</sub>Bi<sub>30.7</sub>Se<sub>57.1</sub>) as expected from EDX analysis (Table S21). Residual electron densities next to Se1 suggested using anharmonic displacement parameters up to the fourth order (Table S25). An explanation might be a reaction of the Se layer at the van der Waals gap to the additional Sn on the neighboring cation site, resulting in a slightly undulated Se layer.

**Table S23:** Coordinates, site occupancies and equivalent isotropic displacement parameters of Sn<sub>0.75</sub>Bi<sub>2.15</sub>Se<sub>4</sub>; U<sub>eq</sub> = 1/3 [U<sub>33</sub> + 4/3(U<sub>11</sub> + U<sub>22</sub> - U<sub>12</sub>)].

| Atom       | Wyckoff position | <i>x</i> | <i>y</i> | <i>z</i>    | s.o.f. *       | U <sub>eq</sub> / Å <sup>2</sup> |
|------------|------------------|----------|----------|-------------|----------------|----------------------------------|
| Se1        | 4 <i>b</i>       | 0        | 0        | 0.13537(13) | 1              | 0.0235(11)                       |
| Se2        | 4 <i>a</i>       | 0        | 0        | 0.28963(4)  | 1              | 0.0204(4)                        |
| Sn3<br>Bi3 | 3 <i>d</i>       | 0        | 0        | 0           | 0.613<br>0.385 | 0.0252(3)                        |
| Sn4<br>Bi4 | 6 <i>d</i>       | 0        | 0        | 0.42820(2)  | 0.120<br>0.881 | 0.0236(2)                        |

\* from harmonic SHELX refinement, e.s.d.'s ca. 0.002.



**Table S24:** Anisotropic displacement parameters of  $\text{Sn}_{0.75}\text{Bi}_{2.15}\text{Se}_4$ .

| Atom    | Wyckoff position | $U_{11} = U_{22}$ | $U_{33}$  | $U_{12}$  | $U_{13} = U_{23}$ |
|---------|------------------|-------------------|-----------|-----------|-------------------|
| Se1     | 4b               | 0.142(10)         | 0.042(2)  | 0.0071(5) | 0                 |
| Se2     | 4a               | 0.0210(5)         | 0.0192(7) | 0.0105(2) | 0                 |
| Sn3/Bi3 | 3d               | 0.0229(4)         | 0.0297(6) | 0.0115(2) | 0                 |
| Sn4/Bi4 | 6d               | 0.0216(3)         | 0.0278(4) | 0.0108(2) | 0                 |

**Table S25:** Anharmonic displacement parameters site 4b (Se1) of  $\text{Sn}_{0.75}\text{Bi}_{2.15}\text{Se}_4$ .

| C <sub>111</sub>  | C <sub>112</sub>  | C <sub>113</sub>  | C <sub>122</sub>  | C <sub>123</sub>  | C <sub>133</sub>  | C <sub>222</sub>  | C <sub>223</sub>  |
|-------------------|-------------------|-------------------|-------------------|-------------------|-------------------|-------------------|-------------------|
| -0.001(3)         | -0.0006(14)       | -0.0005(4)        | 0.0006(14)        | -0.0002(2)        | 0                 | 0.001(3)          | -0.0005(4)        |
| C <sub>233</sub>  | C <sub>333</sub>  |                   |                   |                   |                   |                   |                   |
| 0                 | 0.000116(16)      |                   |                   |                   |                   |                   |                   |
| D <sub>1111</sub> | D <sub>1112</sub> | D <sub>1113</sub> | D <sub>1122</sub> | D <sub>1123</sub> | D <sub>1133</sub> | D <sub>1222</sub> | D <sub>1223</sub> |
| -0.041(12)        | -0.021(6)         | 0.0003(4)         | -0.021(6)         | 0.00014(19)       | -0.00011(6)       | -0.021(6)         | -0.00014(19)      |
| D <sub>1233</sub> | D <sub>1333</sub> | D <sub>2222</sub> | D <sub>2223</sub> | D <sub>2233</sub> | D <sub>2333</sub> | D <sub>3333</sub> |                   |
| -0.00006(3)       | 0                 | -0.041(12)        | -0.0003(4)        | -0.00011(6)       | 0                 | -0.000001(3)      |                   |

**Table S26:** Comparison of the reported structures in the pseudo-binary system  $\text{SnSe-Bi}_2\text{Se}_3$  with structure types, sum formulae and formulae normalized according to  $(\text{SnSe})_x(\text{Bi}_2\text{Se}_3)$ .

| sum formula as used in the manuscript                   | structure type                   | sum formula according to $(\text{SnSe})_x(\text{Bi}_2\text{Se}_3)$ |
|---------------------------------------------------------|----------------------------------|--------------------------------------------------------------------|
| $\text{Sn}_{0.582}\text{Bi}_{0.279}\text{Se}^*$         | NaCl-type                        | $(\text{SnSe})_{4.17}(\text{Bi}_2\text{Se}_3)$ , $x \approx 4.17$  |
| $\text{Sn}_{0.57}\text{Bi}_{0.29}\text{Se}$             | NaCl-type                        | $(\text{SnSe})_4(\text{Bi}_2\text{Se}_3)$ , $x = 4$                |
| $\text{Sn}_{0.5}\text{Bi}_{0.33}\text{Se}$              | NaCl-type                        | $(\text{SnSe})_3(\text{Bi}_2\text{Se}_3)$ , $x = 3$                |
| $\text{Sn}_{3.6}\text{Bi}_{3.6}\text{Se}_9$             | L7,7-type                        | $(\text{SnSe})_2(\text{Bi}_2\text{Se}_3)$ , $x = 2$                |
| $\text{Sn}_{11.49}\text{Bi}_{12.39}\text{Se}_{30}$      | L4,7-type                        | $(\text{SnSe})_{1.85}(\text{Bi}_2\text{Se}_3)$ , $x \approx 1.85$  |
| $\text{Sn}_{2.22}\text{Bi}_{2.52}\text{Se}_6$           | L4,4-type                        | $(\text{SnSe})_{1.76}(\text{Bi}_2\text{Se}_3)$ , $x \approx 1.76$  |
| $\text{Sn}_{9.52}\text{Bi}_{10.96}\text{Se}_{26}$       | L4,5-type                        | $(\text{SnSe})_{1.74}(\text{Bi}_2\text{Se}_3)$ , $x \approx 1.74$  |
| $\text{Sn}_{0.85}\text{Bi}_{2.15}\text{Se}_4^{**}$      | $\text{GeSb}_2\text{Te}_4$ -type | $(\text{SnSe})_{0.79}(\text{Bi}_2\text{Se}_3)$ , $x \approx 0.79$  |
| $\text{Sn}_{0.571}\text{Bi}_{2.286}\text{Se}_4$         | $\text{GeSb}_2\text{Te}_4$ -type | $(\text{SnSe})_{0.5}(\text{Bi}_2\text{Se}_3)$ , $x = 0.5$          |
| $\text{Sn}_{4.11}\text{Bi}_{22.60}\text{Se}_{38}^{***}$ | its own structure type           | $(\text{SnSe})_{0.36}(\text{Bi}_2\text{Se}_3)$ , $x \approx 0.36$  |

\* nominal composition of the sample:  $\text{Sn}_{0.625}\text{Bi}_{0.25}\text{Se}$

\*\* decomposition product of  $\text{Sn}_{0.571}\text{Bi}_{2.286}\text{Se}_4$ , cf. Tables S22 to S25.

\*\*\* Structure is described in: Heinke, F.; Werwein, A.; Oeckler, O. Cation disorder and vacancies in the sulfosalt-like phase  $\text{Sn}_{4.11}\text{Bi}_{22.60}\text{Se}_{38}$  - A resonant X-ray diffraction study. *J. Alloys Compd.* **2016**, *701*, 581-586.
